# Supplementary material for: Association between Antibiotic Consumption and Resistance in Mink Production
Source: MDPI journal article supplement (doi:10.3390/antibiotics11070927), 2022-07-09
Supplement: s1 [file s1]

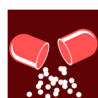

Supplementary Materials

### Total antimicrobial consumption 2017

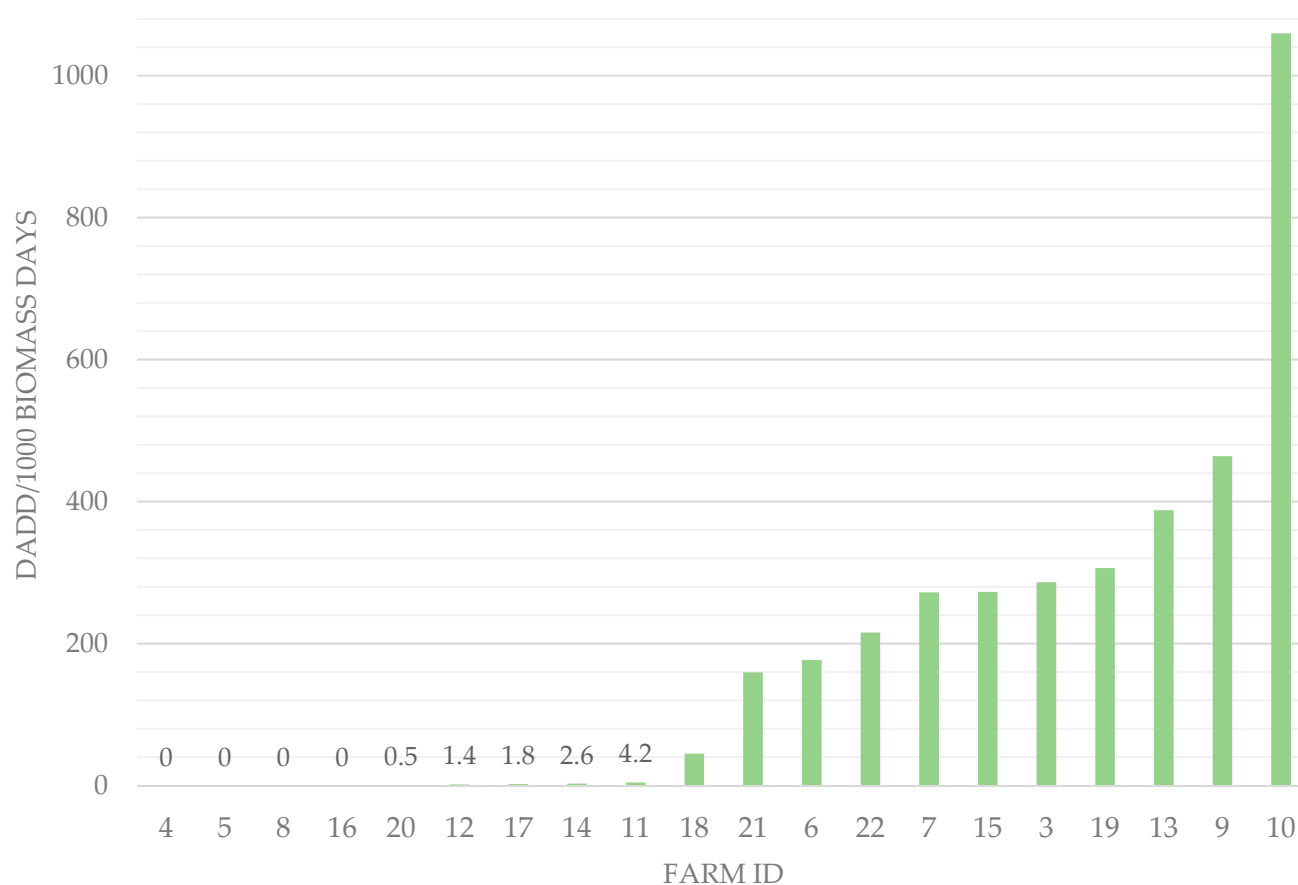

**Figure S1.** Total antibiotic consumption in 2017. DADD: defined daily animal dose, the assumed average dose needed to treat one kg animal, biomass days calculated as in Jensen et al. [16]

**Table S1.** Epidemiological cut-off values (ECOFF) (g/L) for *Staphylococcus delphini* and *Escherichia coli*.

| <i>Staphylococcus delphini</i>      |                    | <i>Escherichia coli</i>                |                 |
|-------------------------------------|--------------------|----------------------------------------|-----------------|
| Antibiotic                          | ECOFF              | Antibiotic                             | ECOFF           |
| Cefoxitin                           | 4 <sup>a</sup>     | Amoxicillin with clavulanic acid (2:1) | 8 <sup>c</sup>  |
| Chloramphenicol                     | 16 <sup>a</sup>    | Ampicillin                             | 8               |
| Ciprofloxacin                       | 1 <sup>a</sup>     | Apramycin                              | 16 <sup>d</sup> |
| Erythromycin                        | 1 <sup>a</sup>     | Cefotaxime                             | 0.25            |
| Florfenicol                         | 8 <sup>a</sup>     | Ceftiofur                              | 1               |
| Gentamicin                          | 2 <sup>a</sup>     | Chloramphenicol                        | 16              |
| Benzylpenicillin                    | 0.125 <sup>a</sup> | Ciprofloxacin                          | 0.06            |
| Spectinomycin                       | 128 <sup>b</sup>   | Colistin                               | 2               |
| Streptomycin                        | 16 <sup>a</sup>    | Florfenicol                            | 16              |
| Sulphamethoxazole                   | 128 <sup>b</sup>   | Gentamicin                             | 2               |
| Tetracycline                        | 1 <sup>a</sup>     | Nalidixic acid                         | 8               |
| Tiamulin                            | 2 <sup>a</sup>     | Neomycin                               | 8               |
| Trimethoprim with Sulphamethoxazole | 0.25 <sup>b</sup>  | Spectinomycin                          | 64              |
| Trimethoprim                        | 2 <sup>a</sup>     | Streptomycin                           | 16              |
|                                     |                    | Sulfamethoxazole                       | 64              |
|                                     |                    | Tetracycline                           | 8               |
|                                     |                    | Trimethoprim                           | 2               |

<sup>a</sup>ECOFFs adapted from *Staphylococcus aureus* (www.eucast.org [63]); <sup>b</sup>TECOFF for *S. delphini* (Nikolaisen et al. 2020 [27]); <sup>c</sup>ECOFF for amoxicillin alone is applied, according to EUCAST MIC distributions and the setting of epidemiological cut-off (ECOFF) values. EUCAST SOP 10.2, 2021 [69]. <sup>d</sup>Tentative ECOFF obtained using data from: 'DANMAP 2016 - Use of antibiotic agents and occurrence of antibiotic resistance in bacteria from food animals, food and humans in Denmark' [67] and Tian et al. 2019 [68].

**Table S2.** *Staphylococcus delphini* and *Escherichia coli* isolates from Icelandic and Dutch mink farms collected during three sampling rounds in 2018-2019

| <i>Staphylococcus delphini</i> |                |                          |                 |                          |                             |                                                   |              |              |
|--------------------------------|----------------|--------------------------|-----------------|--------------------------|-----------------------------|---------------------------------------------------|--------------|--------------|
| Country                        | Sampling round | Number of feed producers | Number of farms | Total number of isolates | Number of isolates per farm | Proportion of non-wildtype isolates at farm level |              |              |
|                                |                |                          |                 |                          |                             | Benzylpenicillin                                  | Erythromycin | Tetracycline |
| Iceland                        | Weaning        | -                        | 2               | 20                       | 10; 10                      | 0.0; 0.0                                          | 0.0; 0.0     | 0.3; 0.4     |
|                                | Growth         | -                        | 2               | 18                       | 8; 10                       | 0.0; 0.0                                          | 0.0; 0.0     | 0.2; 0.4     |
|                                | Breeding       | -                        | 2               | 17                       | 7; 10                       | 0.0; 0.0                                          | 0.0; 0.0     | 0.0; 0.4     |
| The Netherlands                | Weaning        | -                        | 2               | 20                       | 10; 10                      | 0.1; 0.3                                          | 0.0; 0.1     | 1, 1         |
|                                | Growth         | -                        | 2               | 20                       | 10; 10                      | 0.1; 0.1                                          | 0.0; 0.2     | 1, 1         |
|                                | Breeding       | -                        | 2               | 20                       | 10; 10                      | 0.0; 0.5                                          | 0.0; 0.1     | 0.9; 1       |

  

| <i>Escherichia coli</i> |                |                          |                 |                          |                             |                                                   |           |              |
|-------------------------|----------------|--------------------------|-----------------|--------------------------|-----------------------------|---------------------------------------------------|-----------|--------------|
| Country                 | Sampling round | Number of feed producers | Number of farms | Total number of isolates | Number of isolates per farm | Proportion of non-wildtype isolates at farm level |           |              |
|                         |                |                          |                 |                          |                             | Ampicillin                                        | Amoxiclav | Tetracycline |
| Iceland                 | Weaning        | -                        | 2               | 20                       | 10;10                       | 0.0; 0.2                                          | 0.0; 0.0  | 0.0; 0.1     |
|                         | Growth         | -                        | 2               | 18                       | 8;10                        | 0.1; 0.4                                          | 0.0; 0.0  | 0.0; 0.4     |
| The Netherlands         | Weaning        | -                        | 2               | 16                       | 6;10                        | 0.2; 0.6                                          | 0.0; 0.3  | 0.3; 0.4     |
|                         | Growth         | -                        | 2               | 20                       | 10;10                       | 0.6; 0.7                                          | 0.2; 0.2  | 0.5; 0.7     |

*Weaning*: bacterial sampling in June 2018. *Growth*: bacterial sampling in October 2018. *Breeding*: bacterial sampling in March 2019. Amoxiclav: Amoxicillin with clavulanic acid (2:1)

**Table S3.** Non-wildtype (NWT) profiles of susceptibility tested *S. delphini* from the *weaning*, *growth*, and *breeding* samplings from Denmark (NWT profiles n= 66) (tested isolates n=543), Iceland (NWT profiles n= 5) (tested isolates n= 55), and the Netherlands (NWT profiles n=11) (tested isolates n=60). FOX: cefoxitin, CHL: chloramphenicol, CIP: ciprofloxacin, ERY: erythromycin, FFN: florfenicol, GEN: gentamicin, PEN: penicillin, SPE: spectinomycin, STR: streptomycin, SMX: sulfamethoxazole, TET: tetracycline, TIA: tiamulin, TMP: trimethoprim, TMP+SMX: sulfamethoxazole in combination with trimethoprim (19:1).**Denmark**

| No. of isolates | NWT profile |
|-----------------|-------------|
| 99              | TET         |
| 35              | PEN-TET     |
| 35              | SMX-TET     |
| 34              | ERY- STR    |
| 22              | TET-ERY-STR |
| 19              | ERY         |
| 18              | PEN         |
| 15              | PEN-SMX-TET |
| 15              | SMX         |
| 12              | ERY-SPE     |

---

|    |                                 |
|----|---------------------------------|
| 12 | TMP-SMX-TET                     |
| 11 | SMX-ERY-STR                     |
| 11 | TMP-SMX                         |
| 8  | PEN-TET-ERY-STR                 |
| 8  | PEN-TMP-TET                     |
| 7  | TET-ERY                         |
| 7  | PEN-ERY-STR                     |
| 7  | TMP-TET                         |
| 5  | SMX-TET-ERY-STR                 |
| 5  | TMP                             |
| 5  | TMP-ERY                         |
| 4  | PEN-TMP-SMX-TET                 |
| 4  | SMX-TET-ERY                     |
| 4  | TMP-ERY-STR                     |
| 3  | TET-ERY-SPE                     |
| 3  | PEN-TET-ERY                     |
| 3  | PEN-SMX-ERY-STR                 |
| 3  | PEN-TMP-SMX                     |
| 2  | STR                             |
| 2  | STX-TET                         |
| 2  | PEN-TET-ERY-TIA                 |
| 2  | PEN-TMP-STX-TET                 |
| 2  | TMP-TET-ERY-SPE                 |
| 2  | TMP-TET-ERY-STR                 |
| 2  | TMP-SMX-ERY-SPE                 |
| 1  | ERY-STR-CHL-FFN                 |
| 1  | ERY-STR-FOX                     |
| 1  | PEN-ERY                         |
| 1  | PEN-ERY-SPE                     |
| 1  | PEN-TET-ERY-SPE                 |
| 1  | PEN-TET-FFN                     |
| 1  | PEN-TET-SPE                     |
| 1  | PEN-TET-STR                     |
| 1  | PEN-SMX                         |
| 1  | PEN-SMX-TET-ERY                 |
| 1  | PEN-SMX-TET-ERY-STR             |
| 1  | PEN-SMX-TET-ERY-STR-GEN-FOX-TIA |
| 1  | PEN-TMP                         |
| 1  | PEN-TMP-FFN                     |
| 1  | PEN-TMP-SMX-ERY-STR-FOX-TIA-CIP |
| 1  | PEN-TMP-SMX-STR                 |
| 1  | PEN-TMP-SMX-STX-TET             |
| 1  | PEN-TMP-SMX-TET-ERY             |
| 1  | PEN-TMP-SMX-TET-ERY-STR         |

|   |                         |
|---|-------------------------|
| 1 | SMX-ERY                 |
| 1 | SMX-ERY-SPE             |
| 1 | SMX-TET-ERY-GEN-FOX-TIA |
| 1 | SMX-TET-ERY-SPE         |
| 1 | TMP-STX-TET             |
| 1 | TMP-TET-ERY-STR-CHL     |
| 1 | TMP-TET-SPE-TIA         |
| 1 | TMP-SMX-ERY-STR         |
| 1 | TMP-SMX-STX-TET         |

### Iceland

| No. of isolates | NWT profile |
|-----------------|-------------|
| 11              | TET         |
| 3               | TMP         |
| 3               | SMX-TET     |
| 2               | SMX         |
| 1               | TMP-SMX-TET |

### The Netherlands

| No. of isolates | NWT profile                     |
|-----------------|---------------------------------|
| 20              | TMP-SMX-STX-TET                 |
| 15              | TET                             |
| 8               | PEN-TMP-SMX-STX-TET             |
| 5               | TMP-STX-TET                     |
| 4               | TMP-TET                         |
| 2               | PEN-TMP-SMX-STX-TET-ERY-STR-TIA |
| 2               | TMP-STX-TET-ERY                 |
| 1               | STX-TET-TIA                     |
| 1               | PEN-TMP-STX-TET                 |
| 1               | TMP-SMX                         |
| 1               | TMP-SMX-TET                     |

**Table S4:** Non-wildtype (NWT) profiles of susceptibility tested *E.coli* from the *weaning* and *growth* samplings from Denmark (NWT profiles n= 89) (tested isolates n=375), Iceland (NWT profiles n= 7) (tested isolates n= 38), and the Netherlands (NWT profiles n=24) (tested isolates n=36). AUG: amoxicillin in combination with clavulanic acid (2:1), AMP: ampicillin, APR: apramycin, FOT: cefotaxime, XNL: ceftiofur, CHL: chloramphenicol, CIP: ciprofloxacin, COL: colistin, FFN: florfenicol, GEN: gentamicin, NAL: nalidixic acid, NEO: neomycin, SPE: spectinomycin, STR: streptomycin, SMX: sulfamethoxazole, TET: tetracycline, TMP: trimethoprim

### Denmark

| No. of isolates | NWT profile     |
|-----------------|-----------------|
| 29              | TMP             |
| 20              | AMP             |
| 16              | TET             |
| 9               | SMX-TET         |
| 9               | AMP-TMP-SMX-TET |

---

|   |                                 |
|---|---------------------------------|
| 9 | AMP-STR-SPE                     |
| 8 | AMP-TMP-SMX-STR                 |
| 8 | AMP-SMX-STR-SPE-CHL             |
| 7 | TMP-CIP                         |
| 7 | AMP-TMP-SMX-TET-STR             |
| 5 | TMP-TET-STR                     |
| 5 | AMP-TMP-SMX                     |
| 4 | STR                             |
| 4 | AMP-TMP-SMX-STR-SPE             |
| 4 | AMP-TET-STR                     |
| 4 | AMP-SMX-STR-SPE                 |
| 4 | AMP-AUG-TMP                     |
| 3 | TMP-TET-CIP                     |
| 3 | TMP-TET                         |
| 3 | CIP-NAL                         |
| 3 | CIP                             |
| 3 | AMP-TMP-SMX-TET-SPE             |
| 3 | AMP-TMP-SMX-TET-CHL-FFN         |
| 3 | AMP-CIP                         |
| 2 | TMP-CIP-NAL                     |
| 2 | STR-CIP-NAL-XLN                 |
| 2 | AMP-TMP-STR-SPE                 |
| 2 | AMP-TMP-SMX-TET-STR-SPE-CIP-NAL |
| 2 | AMP-SMX-TET-STR-SPE             |
| 2 | AMP-AUG-TMP-SMX-TET-STR-SPE-CHL |
| 2 | AMP-AUG-TMP-SMX-TET-STR         |
| 2 | AMP-AUG-TMP-SMX-STR-SPE         |
| 2 | AMP-AUG-TMP-SMX-STR             |
| 1 | AMP-AUG                         |
| 1 | AMP-AUG-STR-SPE-CIP-XLN         |
| 1 | AMP-AUG-TET-STR                 |
| 1 | AMP-AUG-TET-STR-CHL             |
| 1 | AMP-AUG-TET-STR-SPE-CHL         |
| 1 | AMP-AUG-TMP-SMX-STR-CIP         |
| 1 | AMP-AUG-TMP-SMX-STR-SPE-GEN     |
| 1 | AMP-AUG-TMP-SMX-TET             |
| 1 | AMP-AUG-TMP-SMX-TET-STR-SPE-CIP |
| 1 | AMP-NAL-XLN                     |
| 1 | AMP-SMX-TET-CIP-NAL             |
| 1 | AMP-SMX-TET-STR                 |
| 1 | AMP-STR-SPE-CHL                 |
| 1 | AMP-TET-CIP                     |
| 1 | AMP-TET-STR-CHL                 |
| 1 | AMP-TET-STR-NAL-XLN             |
| 1 | AMP-TMP                         |
| 1 | AMP-TMP-SMX-STR-NEO-CIP-NAL-COL |

---

|   |                                         |
|---|-----------------------------------------|
| 1 | AMP-TMP-SMX-STR-SPE-CHL                 |
| 1 | AMP-TMP-SMX-STR-SPE-XLN-CHL             |
| 1 | AMP-TMP-SMX-STR-XLN                     |
| 1 | AMP-TMP-SMX-TET-NAL                     |
| 1 | AMP-TMP-SMX-TET-STR-SPE                 |
| 1 | AMP-TMP-STR                             |
| 1 | AMP-TMP-STR-CIP-NAL-XLN                 |
| 1 | AMP-TMP-TET-STR                         |
| 1 | AMP-TMP-TET-STR-CIP                     |
| 1 | AMP-TMP-TET-STR-CIP-NAL-XLN             |
| 1 | CIP-NAL-XLN                             |
| 1 | SMX                                     |
| 1 | SMX-CIP-NAL                             |
| 1 | SMX-STR                                 |
| 1 | SMX-TET-CIP-NAL-COL                     |
| 1 | SMX-TET-NEO                             |
| 1 | SMX-TET-STR                             |
| 1 | SMX-TET-STR-NEO-GEN-CIP-NAL-XLN-FOT-COL |
| 1 | STR-CIP                                 |
| 1 | TET-CIP                                 |
| 1 | TET-CIP-NAL                             |
| 1 | TET-STR                                 |
| 1 | TMP-CIP-NAL-XLN-FOT                     |
| 1 | TMP-SMX                                 |
| 1 | TMP-SMX-TET                             |
| 1 | TMP-SMX-TET-CIP                         |
| 1 | TMP-SMX-TET-XLN                         |
| 1 | TMP-STR                                 |
| 1 | TMP-STR-SPE-COL                         |
| 1 | TMP-TET-CIP-NAL                         |
| 1 | TMP-TET-NAL-XLN                         |
| 1 | TMP-TET-STR-CIP-FFN                     |
| 1 | TMP-TET-STR-CIP-NAL-COL                 |
| 1 | TMP-TET-STR-CIP-NAL-XLN-CHL-FFN         |
| 1 | TMP-XLN                                 |
| 1 | XLN                                     |

### Iceland

| No. of isolates | NWT profile                     |
|-----------------|---------------------------------|
| 4               | AMP                             |
| 2               | TET                             |
| 1               | AMP-SMX-STR                     |
| 1               | AMP-TMP-SMX-TET-STR-CIP-NAL-COL |
| 1               | SMX-STR                         |
| 1               | TMP-TET                         |
| 1               | XLN                             |

## The Netherlands

| No. of isolates | NWT profile                                                 |
|-----------------|-------------------------------------------------------------|
| 2               | AMP-TMP                                                     |
| 2               | AMP-TMP-SMX                                                 |
| 2               | AMP-TMP-SMX-STR-SPE                                         |
| 2               | SMX-TET-STR-SPE                                             |
| 1               | AMP-AUG-SMX-STR-NEO-GEN-APR-CIP-NAL-XLN-FOT-COL             |
| 1               | AMP-AUG-TMP-SMX-STR-SPE                                     |
| 1               | AMP-AUG-TMP-SMX-TET-STR-SPE-NEO-GEN-APR-CIP-NAL-XLN-FOT-COL |
| 1               | AMP-TMP-SMX-NEO                                             |
| 1               | AMP-TMP-SMX-STR                                             |
| 1               | AMP-TMP-SMX-STR-NEO                                         |
| 1               | AMP-TMP-SMX-STR-SPE-CIP                                     |
| 1               | AMP-TMP-SMX-STR-SPE-CIP-NAL                                 |
| 1               | AMP-TMP-SMX-STR-SPE-CIP-NAL-XLN                             |
| 1               | AMP-TMP-SMX-STR-SPE-NEO                                     |
| 1               | AMP-TMP-SMX-TET-STR-CIP                                     |
| 1               | AMP-TMP-SMX-TET-STR-CIP-NAL                                 |
| 1               | AMP-TMP-SMX-TET-STR-SPE-CIP-NAL                             |
| 1               | AMP-TMP-SMX-TET-STR-SPE-GEN-APR-CHL                         |
| 1               | AMP-TMP-SMX-XLN-FOT                                         |
| 1               | SMX-TET-STR-NEO-GEN-APR-CIP-NAL-XLN-FOT-CHL-FFN-COL         |
| 1               | TMP                                                         |
| 1               | TMP-SMX-STR-SPE-CIP-NAL                                     |
| 1               | TMP-SMX-TET-STR-SPE-GEN                                     |
| 1               | TMP-SMX-TET-STR-SPE-NEO-GEN-APR-CIP-NAL-XLN-FOT-COL         |
